# Supplementary material
Source: PubMed Central journal article supplement (PMC6261442)
Supplement: NIHMS927236-supplement-Supplemental.pdf [file NIHMS927236-supplement-Supplemental.pdf]

## On-line Supplement

### Serologic responses in childhood pulmonary tuberculosis

Bareng A. S. Nonyane, Mark P. Nicol, Nicholas J. Andreas, Stefanie Rimmele, Nicole Schneiderhan-Marra, Lesley J. Workman, Mark D. Perkins, Thomas Joos, Tobias Broger, Jerrold J. Ellner, David Alland, Beate Kampmann, Susan E. Dorman, Heather J. Zar

#### Contents

Luminex Assay Validation: page 3

Generation of the optimal linear combinations of antigens  
and risk probability: page 6

Supplementary Table S1: page 7

*Antigen list.*

Supplementary Table S2: page 12

*Optimum cut-off values and area under the curve (AUC) for single antigens for discrimination between children classified as Definite TB versus children classified as Unlikely TB, for all ages*

Supplementary Table S3: page 17

*Optimum cut-off values and area under the curve (AUC) for single antigens for discrimination between children classified as Definite TB versus children classified as Unlikely TB, for children 60 months and older*

Supplementary Table S4: page 22

*Optimum cut-off values and area under the curve (AUC) for single antigens for discrimination between children classified as Definite TB versus children classified as Unlikely TB, for children 12 months to 59 months old*

Supplementary Table S5 page 27

*Optimum cut-off values and area under the curve (AUC) for single antigens for discrimination between children classified as Definite TB versus children classified as Unlikely TB/Mantoux test negative, for all ages*

Supplementary Table S6 page 32

*Optimum cut-off values and area under the curve (AUC) for single antigens for discrimination between children classified as Definite TB versus children classified as Unlikely TB/Mantoux test positive, for all ages*

Supplementary Table S7 page 37

*Optimum cut-off values and area under the curve (AUC) for single antigens for discrimination between children classified as Definite TB versus children classified as Unconfirmed TB, for all ages*

## Luminex assay validation

### *Precision*

A dilution of 1:200 was chosen after confirming linear behavior of log-converted measurements at different sample dilutions. Intra-assay coefficients of variation were calculated on the basis of eight replicates of six different TB positive serum samples from the FIND biobank as described elsewhere[17]. Samples with low, medium and high signals were chosen based on the results of previous experiments. The technical replicates were generated from a single source. Inter-assay coefficients of variation were generated in triplicates in three different runs in addition to the eight replicates of the intra-assay CV experiment. The results for intra- and inter-assay CV are summarized in Tables S1A and S1B. Only %CVs from positive signals (>3x negative control) are shown. Intra-assay CVs were all <10% (mean 4% to 34%) for all six tested serum samples and all antigens. Inter-assay CVs were within a comparable range and both results were within the desired range.

| <b>Intra-assay coefficients of variation for TB positive serum samples</b> |                         |                 |                 |                 |                 |                 |
|----------------------------------------------------------------------------|-------------------------|-----------------|-----------------|-----------------|-----------------|-----------------|
| <b>%CV</b>                                                                 | <b>Positive control</b> | <b>Sample 1</b> | <b>Sample 2</b> | <b>Sample 3</b> | <b>Sample 4</b> | <b>Sample 5</b> |
| Mean                                                                       | 4                       | 6               | 7               | 6               | 7               | 10              |
| Min                                                                        | 1                       | 3               | 2               | 1               | 2               | 1               |
| Max                                                                        | 8                       | 11              | 10              | 11              | 14              | 34              |
| <10%                                                                       | 23                      | 3               | 12              | 22              | 4               | 8               |
| 10-20%                                                                     | 0                       | 1               | 0               | 2               | 1               | 2               |
| >20%                                                                       | 0                       | 0               | 0               | 0               | 0               | 1               |
| <b>Inter-assay coefficients of variation for TB positive serum samples</b> |                         |                 |                 |                 |                 |                 |
| <b>%CV</b>                                                                 | <b>Positive control</b> | <b>Sample 1</b> | <b>Sample2</b>  | <b>Sample3</b>  | <b>Sample4</b>  | <b>Sample5</b>  |
| Mean                                                                       | 7                       | 8               | 6               | 9               | 9               | 12              |
| Min                                                                        | 4                       | 6               | 4               | 3               | 6               | 2               |
| Max                                                                        | 10                      | 10              | 8               | 12              | 14              | 35              |
| <10%                                                                       | 20                      | 3               | 10              | 17              | 4               | 5               |

|        |   |   |   |   |   |   |
|--------|---|---|---|---|---|---|
| 10-20% | 2 | 1 | 0 | 6 | 1 | 5 |
| >20%   | 0 | 0 | 0 | 0 | 0 | 1 |

### *Freeze and thaw stability*

The median fluorescence intensity (MFI) values generated with the fresh sample pool were set to 100% and all further freeze/thaw cycle values were calculated relative to that value. The mean values for the remaining signals for the sample comprised of three pooled TB positive serum samples on all antigens were 93% for one freeze/thaw cycle, 93% for two freeze/thaw cycles, 91% for three freeze/thaw cycles and 96% for four freeze/thaw cycles. Thus, the antibodies in the sample pool appeared stable over at least four freeze/thaw cycles.

| <b>Mean values and range of antibody freeze/thaw stability</b> |                            |                             |                             |                             |
|----------------------------------------------------------------|----------------------------|-----------------------------|-----------------------------|-----------------------------|
| <b>Recovery (%)</b>                                            | <b>1 freeze/thaw cycle</b> | <b>2 freeze/thaw cycles</b> | <b>3 freeze/thaw cycles</b> | <b>4 freeze/thaw cycles</b> |
| Mean                                                           | 93                         | 93                          | 91                          | 96                          |
| Min                                                            | 61                         | 63                          | 65                          | 71                          |
| Max                                                            | 110                        | 114                         | 107                         | 112                         |

### *Antigen stability on beads*

For large sample screenings, it is desirable to have antigen-coupled bead sets that are stable over a longer period of time to achieve comparable results. Recombinant His-tagged proteins immobilized on beads were visualized in each assay with a mouse-anti-His antibody followed by the detection using an RPE-labelled goat-anti-mouse antibody. The signals obtained in the first measurement were taken as the reference signal for all consecutive measurements. The relative signal intensities for four representative antigens over a period of 16 weeks are shown below. Immobilized antigens on beads were stable over at least a time period of seven weeks. A considerable signal loss was observed after ten weeks. No correlation was found between the overall MFI signal intensity generated with the anti-His antibody and the stability of the antigens.

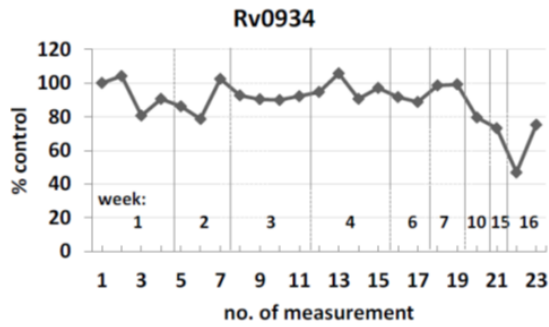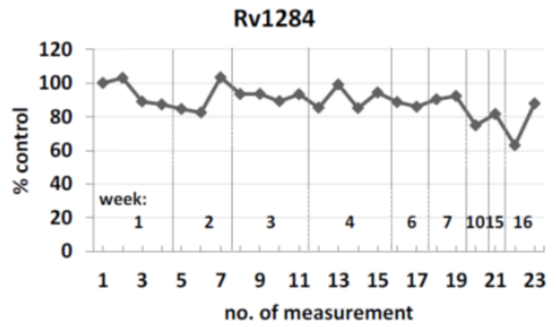

D

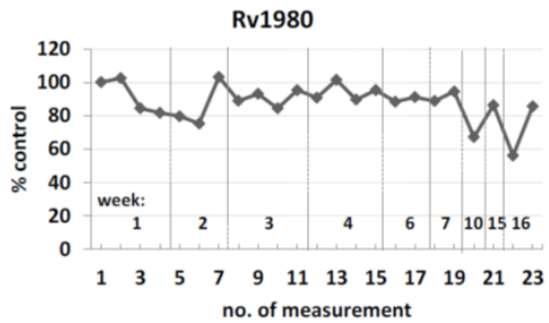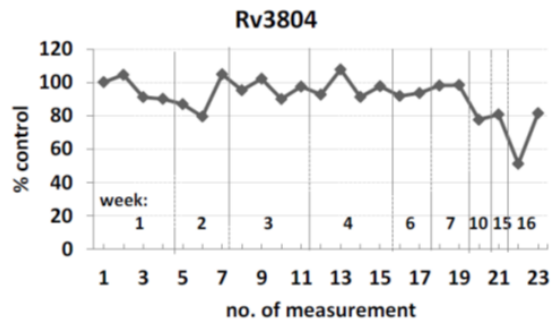

Additional measures to ensure the quality of the results included measurement of several control samples in addition to patient samples on each 96-well plate. The controls included three (non-endemic) negative control samples from healthy donors and 1 positive control sample. The positive control sample was systematically generated through the combination of three positive sera and showed reactivity to most antigens (Planatscher H et al, Sci Rep 2013;3:3259). Signals for all antigens from independent measurements of the control sample on different plates correlated well ( $>0.98$ ), confirming the stability of the assay and reliability of results.

### **Generation of the optimal linear combinations of antigens and risk probability**

We conducted variable selection, among the antibody responses with  $AUC > 0.5$ , using the generalized linearized elastic net algorithm (Friedman et al (2008)), which is implemented in the R package *cv.glmnet*. This algorithm applies cross validation to select the best predictors that optimize the elastic net penalty, allowing highly correlated predictors to have similar coefficients. Because our outcome was binary (e.g. discrimination between children classified as Definite TB versus children classified as Unlikely TB), we applied the logit link. *Cv.glmnet* was applied with default options, and the selected subset of antibody responses were those with non-zero coefficients at the point where the mean cross-validation error was minimal. The predicted logit link function from this model is the optimal linear combination of selected antibody responses, and it was used to generate in-sample predictions of TB risk probabilities for each child.

**Supplementary Table S1. Antigen list.**

| <b>Rv number</b> | <b>Antigen name</b>       | <b>Supplier</b> | <b>Comments</b>                                            |
|------------------|---------------------------|-----------------|------------------------------------------------------------|
|                  | C10.E6_IDRI               | IDRI            | Complex of Rv3874-Rv3875<br>(CFP10-ESAT6, esxB-esxA)       |
|                  | Rv3874.Rv3875_SSI         |                 | Complex of Rv3874-Rv3875<br>(CFP10-ESAT6, esxB-esxA)       |
|                  | DID64_IDRI                | IDRI            | 64 kDa fusion protein comprised of<br>Rv2031-Rv0934-Rv3874 |
|                  | DID90_IDRI                | IDRI            | 90 kDa fusion protein comprised of<br>Rv2031-Rv0934-Rv2032 |
|                  | Rv2031c.Rv2873_SSI        |                 | Fusion protein comprised of<br>Rv2031c-Rv2873              |
|                  | TBF10_IDRI                | IDRI            | Fusion protein comprised of Rv0379-<br>Rv0934-Rv3874       |
|                  | Antigen.Cocktail.V_Lionex | Lionex          | Recombinant antigen cocktail<br>comprised of 4 antigens    |
| Rv0212           | Rv0212_FIND_A.2.ss        | FIND_A          |                                                            |
| Rv0222           | Rv0222_SSI                | SSI             | RD 4                                                       |
| Rv0272           | Rv0272_FIND_A.2.ss        | FIND_A          |                                                            |
| Rv0302           | Rv0302_FIND_A.3           | FIND_A          |                                                            |
| Rv0379           | Rv0379_FIND_A.1           | FIND_A          |                                                            |
| Rv0394           | Rv0394_FIND_A.3           | FIND_A          |                                                            |
| Rv0440           | Rv0440_FIND_A.4           | FIND_A          |                                                            |
| Rv0456c          | Rv0456c_FIND_A.1          | FIND_A          |                                                            |
| Rv0577           | Rv0577_SSI                | SSI             |                                                            |
| Rv0583c          | Rv0583c_FIND_A.3          | FIND_A          |                                                            |
| Rv0632c          | Rv0632c_FIND_A.3          | FIND_A          |                                                            |
| Rv0798c          | Rv0798c_FIND_A.2.ls       | FIND_A          |                                                            |
| Rv0801           | Rv0801_FIND_A.2.ls        | FIND_A          |                                                            |
| Rv0831           | Rv0831_IDRI               | IDRI            |                                                            |

|         |                                   |        |                      |
|---------|-----------------------------------|--------|----------------------|
| Rv0934  | Rv0934_FIND_A.1                   | FIND_A |                      |
|         | Rv0934_IDRI                       | IDRI   |                      |
| Rv0944  | Rv0944_FIND_A.4                   | FIND_A |                      |
| Rv0984  | Rv0984_FIND_A.3                   | FIND_A |                      |
| Rv1009  | Rv1009_IDRI                       | IDRI   |                      |
| Rv1030  | Rv1030_FIND_A.6                   | FIND_A |                      |
|         | Rv1030extern_FIND                 | FIND   | Extracellular region |
|         | Rv1030intra_FIND                  | FIND   | Intracellular region |
| Rv1099  | Rv1099_IDRI                       | IDRI   |                      |
| Rv1175  | Rv1175_FIND                       | FIND   |                      |
|         | Rv1175c_FIND_A.6.2nd.cou<br>pling | FIND_A |                      |
| Rv1175  | Rv1196_FIND_A.3                   | FIND_A |                      |
| Rv1175  | Rv1242_FIND_A.2.ls                | FIND_A |                      |
| Rv1284  | Rv1284_FIND_A.1                   | FIND_A |                      |
| Rv1387  | Rv1387_FIND_A7                    | FIND_A |                      |
| Rv1387  | Rv1411c_FIND_A.1                  | FIND_A |                      |
| Rv1387  | Rv1566c_FIND_A.1                  | FIND_A |                      |
| Rv1586c | Rv1586c_SSI                       | SSI    | RD3                  |
| Rv1629  | Rv1629_FIND_A.6                   | FIND_A |                      |
|         | Rv1629_FIND                       | FIND   |                      |
| Rv1636  | Rv1636_SSI                        | SSI    |                      |
| Rv1837c | Rv1837c_FIND_A.3                  | FIND_A |                      |
| Rv1860  | Rv1860_FIND_A.1                   | FIND_A |                      |
|         | Rv1860_IDRI                       | IDRI   |                      |
|         | Rv1860_Lionex                     | Lionex |                      |
| Rv1886  | Rv1886c_FIND_A.6                  | FIND_A |                      |
|         | Rv1886_FIND                       | FIND   |                      |
|         | Rv1886_IDRI                       | IDRI   |                      |
| Rv1926c | Rv1926c_FIND_A.3                  | FIND_A |                      |



|         |                        |        |     |
|---------|------------------------|--------|-----|
| Rv1980  | Rv1980_SSI             | SSI    | RD2 |
|         | Rv1980_IDRI            | IDRI   | RD2 |
| Rv1980c | Rv1980c_FIND_A.3       | FIND_A | RD2 |
| Rv1984  | Rv1984_FIND_A.2.ss     | FIND_A | RD2 |
|         | Rv1984_SSI             | SSI    | RD2 |
|         | Rv1984c_FIND_A.6       | FIND_A | RD2 |
|         | Rv1984_IDRI            | IDRI   | RD2 |
| Rv2031c | Rv2031c_FIND_A.1       | FIND_A |     |
|         | Rv2031_IDRI            | IDRI   |     |
| Rv2032  | Rv2032_IDRI            | IDRI   |     |
| Rv2094c | Rv2094c_FIND_A.6       | FIND_A |     |
|         | Rv2094_FIND            | FIND   |     |
| Rv2151  | Rv2151_FIND_A.4        | FIND_A |     |
| Rv2185c | Rv2185c_SSI            | SSI    |     |
| Rv2220  | Rv2220_IDRI            | IDRI   |     |
| Rv2252  | Rv2252.T01_FIND_A.2.ls | FIND_A |     |
| Rv2282  | Rv2282_FIND_A.2.ss     | FIND_A |     |
| Rv2396  | Rv2396_FIND_A7         | FIND_A |     |
|         | Rv2396_FIND            | FIND   |     |
| Rv2462c | Rv2462c_SSI            | SSI    |     |
| Rv2544  | Rv2544_FIND_A.4        | FIND_A |     |
| Rv2618  | Rv2618_FIND_A.4        | FIND_A |     |
| Rv2746c | Rv2746c_FIND_A7        | FIND_A |     |
| Rv2870  | Rv2870_FIND_A.4        | FIND_A |     |
| Rv2873  | Rv2873_FIND            | FIND   |     |
|         | Rv2873_FIND_A.6        | FIND_A |     |
|         | Rv2873_IDRI            | IDRI   |     |
| Rv2875  | Rv2875_FIND_A.6        | FIND_A |     |
|         | Rv2875_IDRI            | IDRI   |     |
|         | Rv2875_FIND            | FIND   |     |

|         |                    |        |     |
|---------|--------------------|--------|-----|
| Rv2927  | Rv2927_FIND_A.1    | FIND_A |     |
| Rv2984  | Rv2984_FIND_A.4    | FIND_A |     |
| Rv3050  | Rv3050_FIND_A.2.ss | FIND_A |     |
| Rv3243  | Rv3243_FIND_A.2.ls | FIND_A |     |
| Rv3248  | Rv3248_FIND_A.1    | FIND_A |     |
| Rv3319  | Rv3319_FIND_A.2.ss | FIND_A |     |
| Rv3326  | Rv3326_FIND        | FIND   |     |
|         | Rv3326_FIND_A.2.ss | FIND_A |     |
|         | Rv3326_FIND_A.6    | FIND_A |     |
| Rv3354  | Rv3354_SSI         | SSI    |     |
| Rv3362  | Rv3362_FIND        | FIND   |     |
|         | Rv3362_FIND_A.2.ss | FIND_A |     |
|         | Rv3362c_FIND_A.6   | FIND_A |     |
| Rv3376  | Rv3376_FIND_A.3    | FIND_A |     |
| Rv3495  | Rv3495_FIND        | FIND   |     |
|         | Rv3495c_FIND_A.6   | FIND_A |     |
| Rv3616  | Rv3616_FIND        | FIND   |     |
|         | Rv3616_FIND_A.5    | FIND_A |     |
| Rv3628  | Rv3628_FIND_A.4    | FIND_A |     |
| Rv3762c | Rv3762c_FIND_A.3   | FIND_A |     |
| Rv3763  | Rv3763_FIND_A.3    | FIND_A |     |
| Rv3775  | Rv3775_FIND_A.2.ss | FIND_A |     |
| Rv3804  | Rv3804_IDRI        | IDRI   |     |
|         | Rv3804c_FIND_A.1   | FIND_A |     |
| Rv3810  | Rv3810_FIND_A7     | FIND_A |     |
|         | Rv3810_FIND        | FIND   |     |
| Rv3841  | Rv3841_IDRI        | IDRI   |     |
| Rv3864  | Rv3864_FIND_A.5    | FIND_A |     |
| Rv3872  | Rv3872_SSI         | SSI    | RD1 |
| Rv3874  | Rv3874_IDRI        | IDRI   | RD1 |

|                                                                                                                                                                           |                  |        |                           |
|---------------------------------------------------------------------------------------------------------------------------------------------------------------------------|------------------|--------|---------------------------|
|                                                                                                                                                                           | Rv3874_FIND_A.1  | FIND_A | RD1                       |
|                                                                                                                                                                           | Rv3874_Lionex    | Lionex | RD1                       |
| Rv3875                                                                                                                                                                    | Rv3875_FIND      | FIND   | RD1                       |
|                                                                                                                                                                           | Rv3875_Lionex    | Lionex | RD1                       |
|                                                                                                                                                                           | Rv3875_FIND_A7   | FIND_A | RD1                       |
| Rv3878                                                                                                                                                                    | Rv3878_FIND_A.1  | FIND_A | RD1                       |
| Rv3879c                                                                                                                                                                   | Rv3879c.SSI      | SSI    | Amino acids 1 to 181; RD1 |
| Rv3881                                                                                                                                                                    | Rv3881c_FIND_A.1 | FIND_A |                           |
|                                                                                                                                                                           | Rv3881_IDRI      | IDRI   |                           |
| <p>Abbreviations: IDRI, Infectious Disease Research Institute; SSI Statens Serum Institute; FIND, Foundation for Innovative New Diagnostics; RD, Region of Difference</p> |                  |        |                           |

**Supplementary Table S2. Optimum cut-off values and area under the curve (AUC) for single antigens for discrimination between children classified as Definite TB versus children classified as Unlikely TB, for all ages**

| <b>Antigen Name</b> | <b>Optimum cut-off value</b> | <b>AUC</b> | <b>Sensitivity</b> | <b>Specificity</b> |
|---------------------|------------------------------|------------|--------------------|--------------------|
| DID64_IDRI          | 83.00                        | 0.63       | 0.60               | 0.60               |
| Rv3875_FIND         | 309.00                       | 0.61       | 0.60               | 0.61               |
| Rv3616_FIND_A.5     | 93.00                        | 0.60       | 0.55               | 0.55               |
| DID90_IDRI          | 117.00                       | 0.59       | 0.58               | 0.58               |
| Rv3804c_FIND_A.1    | 154.00                       | 0.58       | 0.55               | 0.50               |
| Rv3628_FIND_A.4     | 516.00                       | 0.58       | 0.53               | 0.53               |
| TBF10_IDRI          | 85.00                        | 0.58       | 0.53               | 0.53               |
| C10.E6_IDRI         | 117.00                       | 0.57       | 0.58               | 0.58               |
| Rv3874_Lionex       | 139.00                       | 0.57       | 0.58               | 0.58               |
| Rv1636_SSI          | 115.00                       | 0.57       | 0.55               | 0.56               |
| Rv3804_IDRI         | 184.00                       | 0.57       | 0.55               | 0.58               |
| Rv0831_IDRI         | 782.00                       | 0.57       | 0.63               | 0.58               |
| Rv1886_IDRI         | 234.00                       | 0.56       | 0.53               | 0.53               |
| Rv2873_FIND         | 94.00                        | 0.56       | 0.60               | 0.58               |
| Rv2873_IDRI         | 152.00                       | 0.55       | 0.58               | 0.56               |
| Rv2220_IDRI         | 529.00                       | 0.55       | 0.58               | 0.55               |
| Rv3874.Rv3875_SSI   | 157.00                       | 0.55       | 0.55               | 0.53               |
| Rv3881c_FIND_A.1    | 245.00                       | 0.55       | 0.55               | 0.53               |
| Rv3875_Lionex       | 206.00                       | 0.55       | 0.55               | 0.48               |
| Rv1886_FIND         | 150.00                       | 0.55       | 0.53               | 0.51               |
| Rv3874_IDRI         | 178.00                       | 0.55       | 0.50               | 0.50               |
| Rv2031c.Rv2873_SSI  | 102.00                       | 0.55       | 0.55               | 0.55               |
| Rv1629_FIND         | 138.00                       | 0.55       | 0.55               | 0.55               |

|                           |        |      |      |      |
|---------------------------|--------|------|------|------|
| Rv1030intra_FIND          | 222.00 | 0.54 | 0.55 | 0.53 |
| Rv3864_FIND_A.5           | 74.00  | 0.54 | 0.55 | 0.55 |
| Rv0934_IDRI               | 247.00 | 0.54 | 0.58 | 0.51 |
| Rv2032_IDRI               | 156.00 | 0.54 | 0.53 | 0.48 |
| Rv1980_SSI                | 192.00 | 0.53 | 0.55 | 0.53 |
| Rv3872_SSI                | 92.00  | 0.53 | 0.58 | 0.58 |
| Rv3495_FIND               | 143.00 | 0.53 | 0.55 | 0.50 |
| Rv0456c_FIND_A.1          | 495.00 | 0.53 | 0.53 | 0.50 |
| Rv1099_IDRI               | 343.00 | 0.53 | 0.53 | 0.53 |
| Rv0222_SSI                | 147.00 | 0.53 | 0.53 | 0.53 |
| Rv3354_SSI                | 94.00  | 0.53 | 0.53 | 0.53 |
| Rv0934_FIND_A.1           | 87.00  | 0.52 | 0.58 | 0.48 |
| Rv2396_FIND               | 217.00 | 0.52 | 0.53 | 0.51 |
| Rv2875_FIND               | 214.00 | 0.52 | 0.50 | 0.50 |
| Rv3810_FIND               | 99.00  | 0.51 | 0.53 | 0.50 |
| Rv3841_IDRI               | 376.00 | 0.51 | 0.53 | 0.51 |
| Rv0632c_FIND_A.3          | 633.00 | 0.51 | 0.53 | 0.51 |
| Rv1175_FIND               | 111.00 | 0.50 | 0.50 | 0.48 |
| Antigen.Cocktail.V_Lionex | 129.00 | 0.50 | 0.48 | 0.46 |
| Rv1009_IDRI               | 385.00 | 0.50 | 0.55 | 0.54 |
| Rv2462c_SSI               | 139.00 | 0.50 | 0.53 | 0.49 |
| Rv1196_FIND_A.3           | 152.00 | 0.50 | 0.50 | 0.50 |
| Rv3326_FIND               | 127.00 | 0.49 | 0.53 | 0.48 |
| Rv1886c_FIND_A.6          | 85.00  | 0.49 | 0.50 | 0.50 |
| Rv0394_FIND_A.3           | 123.00 | 0.49 | 0.50 | 0.49 |
| Rv0272_FIND_A.2.ss        | 145.00 | 0.49 | 0.53 | 0.51 |
| Rv1629_FIND_A.6           | 130.00 | 0.49 | 0.48 | 0.48 |
| Rv0577_SSI                | 265.00 | 0.49 | 0.50 | 0.49 |
| Rv1387_FIND_A7            | 112.00 | 0.49 | 0.50 | 0.50 |
| Rv2396_FIND_A7            | 923.00 | 0.49 | 0.50 | 0.50 |

|                               |         |      |      |      |
|-------------------------------|---------|------|------|------|
| Rv3874_FIND_A.1               | 117.00  | 0.49 | 0.48 | 0.49 |
| Rv3248_FIND_A.1               | 198.00  | 0.48 | 0.50 | 0.50 |
| Rv3879c.amino.acids.1.181_SSI | 195.00  | 0.48 | 0.48 | 0.49 |
| Rv3881_IDRI                   | 183.00  | 0.48 | 0.50 | 0.46 |
| Rv2031_IDRI                   | 49.00   | 0.48 | 0.48 | 0.48 |
| Rv3616_FIND                   | 139.00  | 0.48 | 0.48 | 0.48 |
| Rv2875_IDRI                   | 442.00  | 0.48 | 0.50 | 0.49 |
| Rv0583c_FIND_A.3              | 1944.00 | 0.48 | 0.53 | 0.53 |
| Rv2875_FIND_A.6               | 124.00  | 0.48 | 0.45 | 0.45 |
| Rv2151_FIND_A.4               | 107.00  | 0.47 | 0.48 | 0.46 |
| Rv3495c_FIND_A.6              | 71.00   | 0.47 | 0.50 | 0.49 |
| Rv1984_IDRI                   | 339.00  | 0.47 | 0.50 | 0.50 |
| Rv1566c_FIND_A.1              | 201.00  | 0.47 | 0.48 | 0.48 |
| Rv1980c_FIND_A.3              | 361.00  | 0.47 | 0.53 | 0.50 |
| Rv2544_FIND_A.4               | 112.00  | 0.47 | 0.50 | 0.49 |
| Rv3362_FIND                   | 147.00  | 0.47 | 0.48 | 0.48 |
| Rv2870_FIND_A.4               | 178.00  | 0.47 | 0.45 | 0.45 |
| Rv2094c_FIND_A.6              | 100.00  | 0.46 | 0.45 | 0.43 |
| Rv3875_FIND_A7                | 53.00   | 0.46 | 0.45 | 0.45 |
| Rv1926c_FIND_A.3              | 205.00  | 0.46 | 0.48 | 0.48 |
| Rv0302_FIND_A.3               | 173.00  | 0.46 | 0.48 | 0.48 |
| Rv1980_IDRI                   | 458.00  | 0.46 | 0.50 | 0.44 |
| Rv2984_FIND_A.4               | 104.00  | 0.46 | 0.50 | 0.49 |
| Rv3326_FIND_A.6               | 145.00  | 0.46 | 0.48 | 0.48 |
| Rv3362c_FIND_A.6              | 181.00  | 0.46 | 0.45 | 0.45 |
| Rv1860_Lionex                 | 115.00  | 0.46 | 0.55 | 0.48 |
| Rv1984_SSI                    | 259.00  | 0.45 | 0.50 | 0.49 |
| Rv2031c_FIND_A.1              | 49.00   | 0.45 | 0.48 | 0.44 |
| Rv0440_FIND_A.4               | 253.00  | 0.45 | 0.45 | 0.45 |
| Rv0379_FIND_A.1               | 74.00   | 0.45 | 0.50 | 0.49 |

|                               |        |      |      |      |
|-------------------------------|--------|------|------|------|
| Rv1586c_SSI                   | 403.00 | 0.45 | 0.48 | 0.48 |
| Rv2094_FIND                   | 163.00 | 0.45 | 0.43 | 0.43 |
| Rv1175c_FIND_A.6.2nd.coupling | 240.00 | 0.45 | 0.45 | 0.45 |
| Rv1860_IDRI                   | 225.00 | 0.44 | 0.48 | 0.48 |
| Rv3362_FIND_A.2.ss            | 105.00 | 0.44 | 0.45 | 0.44 |
| Rv3810_FIND_A7                | 35.00  | 0.44 | 0.45 | 0.44 |
| Rv2746c_FIND_A7               | 46.00  | 0.44 | 0.45 | 0.46 |
| Rv1030extern_FIND             | 164.00 | 0.44 | 0.45 | 0.45 |
| Rv1984_FIND_A.2.ss            | 165.00 | 0.44 | 0.48 | 0.48 |
| Rv2618_FIND_A.4               | 61.00  | 0.44 | 0.43 | 0.41 |
| Rv3762c_FIND_A.3              | 301.00 | 0.44 | 0.45 | 0.45 |
| Rv3878_FIND_A.1               | 50.00  | 0.44 | 0.45 | 0.44 |
| Rv0798c_FIND_A.2.ls           | 252.00 | 0.43 | 0.48 | 0.48 |
| Rv1242_FIND_A.2.ls            | 77.00  | 0.43 | 0.48 | 0.44 |
| Rv3775_FIND_A.2.ss            | 137.00 | 0.43 | 0.50 | 0.45 |
| Rv2282_FIND_A.2.ss            | 63.00  | 0.43 | 0.45 | 0.44 |
| Rv3326_FIND_A.2.ss            | 94.00  | 0.43 | 0.45 | 0.44 |
| Rv0212_FIND_A.2.ss            | 173.00 | 0.42 | 0.45 | 0.46 |
| Rv2185c_SSI                   | 342.00 | 0.42 | 0.40 | 0.40 |
| Rv1030_FIND_A.6               | 71.00  | 0.42 | 0.45 | 0.45 |
| Rv1284_FIND_A.1               | 804.00 | 0.42 | 0.50 | 0.43 |
| Rv3243_FIND_A.2.ls            | 416.00 | 0.42 | 0.45 | 0.45 |
| Rv2873_FIND_A.6               | 89.00  | 0.41 | 0.43 | 0.44 |
| Rv1984c_FIND_A.6              | 167.00 | 0.41 | 0.48 | 0.45 |
| Rv1837c_FIND_A.3              | 186.00 | 0.41 | 0.48 | 0.45 |
| Rv0984_FIND_A.3               | 485.00 | 0.41 | 0.45 | 0.46 |
| Rv2252.T01_FIND_A.2.ls        | 170.00 | 0.41 | 0.50 | 0.41 |
| Rv3050_FIND_A.2.ss            | 140.00 | 0.41 | 0.45 | 0.45 |
| Rv0801_FIND_A.2.ls            | 246.00 | 0.41 | 0.45 | 0.43 |
| Rv3376_FIND_A.3               | 137.00 | 0.41 | 0.43 | 0.43 |

|                    |        |      |      |      |
|--------------------|--------|------|------|------|
| Rv0944_FIND_A.4    | 761.00 | 0.40 | 0.43 | 0.43 |
| Rv1411c_FIND_A.1   | 31.00  | 0.40 | 0.40 | 0.41 |
| Rv2927_FIND_A.1    | 995.00 | 0.40 | 0.40 | 0.40 |
| Rv3319_FIND_A.2.ss | 157.00 | 0.40 | 0.48 | 0.41 |
| Rv3763_FIND_A.3    | 202.00 | 0.39 | 0.40 | 0.39 |
| Rv1860_FIND_A.1    | 125.00 | 0.36 | 0.35 | 0.35 |



**Supplementary Table S3. Optimum cut-off values and area under the curve (AUC) for single antigens for discrimination between children classified as Definite TB versus children classified as Unlikely TB, for children 60 months and older**

| <b>Antigen Name</b> | <b>Optimum cut-off value</b> | <b>AUC</b> | <b>Sensitivity</b> | <b>Specificity</b> |
|---------------------|------------------------------|------------|--------------------|--------------------|
| DID64_IDRI          | 93                           | 0.76       | 0.71               | 0.74               |
| Rv3804c_FIND_A.1    | 153                          | 0.72       | 0.59               | 0.63               |
| TBF10_IDRI          | 108                          | 0.69       | 0.59               | 0.63               |
| Rv3616_FIND_A.5     | 93                           | 0.67       | 0.59               | 0.63               |
| Rv3628_FIND_A.4     | 681                          | 0.66       | 0.59               | 0.63               |
| Rv1009_IDRI         | 300                          | 0.66       | 0.59               | 0.63               |
| Rv0934_FIND_A.1     | 101                          | 0.66       | 0.53               | 0.58               |
| Rv3864_FIND_A.5     | 62                           | 0.65       | 0.65               | 0.63               |
| Rv3875_FIND         | 324                          | 0.63       | 0.59               | 0.63               |
| Rv3362_FIND         | 179                          | 0.62       | 0.53               | 0.53               |
| Rv0394_FIND_A.3     | 147                          | 0.62       | 0.59               | 0.63               |
| Rv0934_IDRI         | 331                          | 0.62       | 0.59               | 0.63               |
| Rv2220_IDRI         | 661                          | 0.62       | 0.59               | 0.63               |
| Rv2094c_FIND_A.6    | 75                           | 0.61       | 0.82               | 0.47               |
| Rv3326_FIND_A.6     | 130                          | 0.61       | 0.65               | 0.53               |
| Rv3362c_FIND_A.6    | 212                          | 0.61       | 0.59               | 0.63               |
| Rv3881_IDRI         | 204                          | 0.61       | 0.59               | 0.63               |
| Rv3326_FIND         | 127                          | 0.61       | 0.71               | 0.47               |
| Rv1387_FIND_A7      | 116                          | 0.61       | 0.53               | 0.58               |
| Rv2544_FIND_A.4     | 132                          | 0.60       | 0.53               | 0.58               |
| Rv2870_FIND_A.4     | 213                          | 0.60       | 0.53               | 0.58               |
| Rv2873_FIND         | 103                          | 0.60       | 0.59               | 0.63               |
| DID90_IDRI          | 147                          | 0.60       | 0.59               | 0.58               |
| Rv0831_IDRI         | 948                          | 0.60       | 0.53               | 0.58               |

|                               |     |      |      |      |
|-------------------------------|-----|------|------|------|
| Rv2875_IDRI                   | 462 | 0.60 | 0.59 | 0.58 |
| Rv2031c.Rv2873_SSI            | 115 | 0.59 | 0.59 | 0.63 |
| Rv2618_FIND_A.4               | 57  | 0.59 | 0.76 | 0.47 |
| Rv3616_FIND                   | 126 | 0.59 | 0.71 | 0.47 |
| Rv3810_FIND                   | 95  | 0.59 | 0.71 | 0.47 |
| Rv1175c_FIND_A.6.2nd.coupling | 202 | 0.58 | 0.53 | 0.58 |
| Rv3874.Rv3875_SSI             | 177 | 0.58 | 0.53 | 0.53 |
| Rv1886_FIND                   | 182 | 0.58 | 0.65 | 0.47 |
| C10.E6_IDRI                   | 129 | 0.58 | 0.59 | 0.53 |
| Rv1196_FIND_A.3               | 162 | 0.57 | 0.53 | 0.47 |
| Rv3248_FIND_A.1               | 180 | 0.57 | 0.53 | 0.58 |
| Rv3874_FIND_A.1               | 166 | 0.57 | 0.53 | 0.58 |
| Rv0456c_FIND_A.1              | 582 | 0.57 | 0.53 | 0.53 |
| Rv1926c_FIND_A.3              | 140 | 0.57 | 0.59 | 0.58 |
| Rv3881c_FIND_A.1              | 301 | 0.56 | 0.53 | 0.58 |
| Rv3804_IDRI                   | 184 | 0.56 | 0.65 | 0.47 |
| Rv3354_SSI                    | 113 | 0.56 | 0.59 | 0.53 |
| Rv1629_FIND                   | 148 | 0.56 | 0.59 | 0.53 |
| Rv3872_SSI                    | 107 | 0.56 | 0.65 | 0.53 |
| Rv0379_FIND_A.1               | 82  | 0.55 | 0.65 | 0.63 |
| Rv2873_IDRI                   | 152 | 0.55 | 0.59 | 0.53 |
| Rv1030intra_FIND              | 312 | 0.55 | 0.53 | 0.58 |
| Rv1886c_FIND_A.6              | 67  | 0.55 | 0.71 | 0.53 |
| Rv1886_IDRI                   | 184 | 0.55 | 0.82 | 0.47 |
| Rv3874_IDRI                   | 234 | 0.54 | 0.47 | 0.47 |
| Rv0272_FIND_A.2.ss            | 141 | 0.54 | 0.59 | 0.47 |
| Rv2031c_FIND_A.1              | 45  | 0.54 | 0.65 | 0.47 |
| Rv3875_Lionex                 | 266 | 0.54 | 0.59 | 0.53 |
| Rv1175_FIND                   | 138 | 0.54 | 0.53 | 0.53 |
| Antigen.Cocktail.V_Lionex     | 132 | 0.53 | 0.47 | 0.47 |

|                               |      |      |      |      |
|-------------------------------|------|------|------|------|
| Rv3362_FIND_A.2.ss            | 89   | 0.53 | 0.65 | 0.47 |
| Rv2875_FIND                   | 228  | 0.53 | 0.53 | 0.47 |
| Rv3495c_FIND_A.6              | 65   | 0.53 | 0.53 | 0.53 |
| Rv3875_FIND_A7                | 46   | 0.53 | 0.53 | 0.53 |
| Rv2984_FIND_A.4               | 96   | 0.53 | 0.47 | 0.53 |
| Rv3762c_FIND_A.3              | 178  | 0.53 | 0.76 | 0.42 |
| Rv0583c_FIND_A.3              | 1239 | 0.52 | 0.53 | 0.58 |
| Rv3874_Lionex                 | 174  | 0.52 | 0.53 | 0.47 |
| Rv1629_FIND_A.6               | 130  | 0.52 | 0.59 | 0.53 |
| Rv3326_FIND_A.2.ss            | 66   | 0.51 | 0.65 | 0.47 |
| Rv3775_FIND_A.2.ss            | 123  | 0.51 | 0.59 | 0.47 |
| Rv0632c_FIND_A.3              | 445  | 0.51 | 0.59 | 0.63 |
| Rv1984_FIND_A.2.ss            | 129  | 0.51 | 0.53 | 0.47 |
| Rv2252.T01_FIND_A.2.ls        | 161  | 0.51 | 0.47 | 0.47 |
| Rv1030_FIND_A.6               | 78   | 0.51 | 0.53 | 0.58 |
| Rv1980_SSI                    | 188  | 0.51 | 0.71 | 0.47 |
| Rv3243_FIND_A.2.ls            | 320  | 0.51 | 0.53 | 0.47 |
| Rv1099_IDRI                   | 1134 | 0.50 | 0.53 | 0.58 |
| Rv2746c_FIND_A7               | 36   | 0.50 | 0.59 | 0.42 |
| Rv0222_SSI                    | 174  | 0.50 | 0.41 | 0.42 |
| Rv3495_FIND                   | 172  | 0.50 | 0.53 | 0.53 |
| Rv0212_FIND_A.2.ss            | 146  | 0.50 | 0.53 | 0.47 |
| Rv3878_FIND_A.1               | 50   | 0.50 | 0.47 | 0.47 |
| Rv3841_IDRI                   | 410  | 0.50 | 0.53 | 0.47 |
| Rv2031_IDRI                   | 49   | 0.49 | 0.59 | 0.47 |
| Rv0577_SSI                    | 277  | 0.49 | 0.47 | 0.47 |
| Rv3879c.amino.acids.1.181_SSI | 151  | 0.49 | 0.53 | 0.37 |
| Rv2875_FIND_A.6               | 130  | 0.49 | 0.47 | 0.47 |
| Rv1980_IDRI                   | 414  | 0.48 | 0.59 | 0.53 |
| Rv0798c_FIND_A.2.ls           | 181  | 0.48 | 0.41 | 0.42 |

|                    |      |      |      |      |
|--------------------|------|------|------|------|
| Rv1860_IDRI        | 194  | 0.48 | 0.59 | 0.47 |
| Rv2462c_SSI        | 156  | 0.48 | 0.47 | 0.47 |
| Rv1586c_SSI        | 351  | 0.48 | 0.59 | 0.47 |
| Rv1411c_FIND_A.1   | 31   | 0.48 | 0.53 | 0.42 |
| Rv2282_FIND_A.2.ss | 59   | 0.48 | 0.47 | 0.47 |
| Rv2032_IDRI        | 218  | 0.48 | 0.47 | 0.47 |
| Rv2396_FIND        | 208  | 0.48 | 0.59 | 0.47 |
| Rv1636_SSI         | 105  | 0.47 | 0.71 | 0.47 |
| Rv2873_FIND_A.6    | 92   | 0.47 | 0.47 | 0.47 |
| Rv3763_FIND_A.3    | 140  | 0.47 | 0.59 | 0.42 |
| Rv2151_FIND_A.4    | 87   | 0.47 | 0.53 | 0.42 |
| Rv0944_FIND_A.4    | 894  | 0.46 | 0.47 | 0.47 |
| Rv3376_FIND_A.3    | 118  | 0.46 | 0.47 | 0.42 |
| Rv1242_FIND_A.2.ls | 69   | 0.46 | 0.53 | 0.47 |
| Rv1860_Lionex      | 115  | 0.46 | 0.65 | 0.42 |
| Rv0984_FIND_A.3    | 371  | 0.46 | 0.53 | 0.47 |
| Rv1566c_FIND_A.1   | 178  | 0.46 | 0.59 | 0.53 |
| Rv2396_FIND_A7     | 1624 | 0.45 | 0.53 | 0.42 |
| Rv3050_FIND_A.2.ss | 104  | 0.45 | 0.76 | 0.37 |
| Rv3319_FIND_A.2.ss | 130  | 0.45 | 0.65 | 0.42 |
| Rv1837c_FIND_A.3   | 133  | 0.45 | 0.59 | 0.47 |
| Rv1984_IDRI        | 326  | 0.44 | 0.59 | 0.47 |
| Rv1980c_FIND_A.3   | 363  | 0.44 | 0.47 | 0.47 |
| Rv1030extern_FIND  | 149  | 0.44 | 0.53 | 0.37 |
| Rv1860_FIND_A.1    | 113  | 0.44 | 0.47 | 0.42 |
| Rv3810_FIND_A7     | 28   | 0.44 | 0.47 | 0.42 |
| Rv1284_FIND_A.1    | 458  | 0.43 | 0.59 | 0.42 |
| Rv1984_SSI         | 195  | 0.42 | 0.59 | 0.42 |
| Rv2094_FIND        | 151  | 0.42 | 0.59 | 0.32 |
| Rv0440_FIND_A.4    | 179  | 0.42 | 0.53 | 0.37 |

|                    |     |      |      |      |
|--------------------|-----|------|------|------|
| Rv0801_FIND_A.2.ls | 202 | 0.42 | 0.41 | 0.42 |
| Rv2927_FIND_A.1    | 995 | 0.38 | 0.35 | 0.37 |
| Rv1984c_FIND_A.6   | 167 | 0.38 | 0.47 | 0.47 |
| Rv0302_FIND_A.3    | 168 | 0.33 | 0.41 | 0.42 |

**Supplementary Table S4. Optimum cut-off values and area under the curve (AUC) for single antigens for discrimination between children classified as Definite TB versus children classified as Unlikely TB, for children 12 months to 59 months old**

| <b>Antigen Name</b> | <b>Optimum cut-off value</b> | <b>AUC</b> | <b>Sensitivity</b> | <b>Specificity</b> |
|---------------------|------------------------------|------------|--------------------|--------------------|
| Rv3875_FIND         | 299                          | 0.587      | 0.65               | 0.59               |
| Rv1636_SSI          | 113                          | 0.576      | 0.57               | 0.56               |
| DID90_IDRI          | 115                          | 0.574      | 0.57               | 0.57               |
| Rv0632c_FIND_A.3    | 682                          | 0.568      | 0.52               | 0.51               |
| Rv3874_Lionex       | 130                          | 0.567      | 0.57               | 0.57               |
| Rv3616_FIND_A.5     | 94                           | 0.562      | 0.52               | 0.52               |
| Rv3881c_FIND_A.1    | 220                          | 0.558      | 0.61               | 0.52               |
| C10.E6_IDRI         | 114                          | 0.552      | 0.57               | 0.57               |
| Rv0302_FIND_A.3     | 196                          | 0.548      | 0.52               | 0.52               |
| DID64_IDRI          | 73                           | 0.548      | 0.57               | 0.56               |
| Rv3804_IDRI         | 175                          | 0.547      | 0.52               | 0.52               |
| Rv0222_SSI          | 160                          | 0.544      | 0.57               | 0.57               |
| Rv2873_FIND         | 103                          | 0.542      | 0.57               | 0.57               |
| Rv3874_IDRI         | 178                          | 0.537      | 0.52               | 0.54               |
| Rv1886_IDRI         | 210                          | 0.537      | 0.48               | 0.49               |
| Rv2873_IDRI         | 152                          | 0.536      | 0.57               | 0.57               |
| Rv3495_FIND         | 136                          | 0.532      | 0.48               | 0.49               |
| Rv3628_FIND_A.4     | 445                          | 0.528      | 0.43               | 0.44               |
| Rv3874.Rv3875_SSI   | 157                          | 0.526      | 0.57               | 0.57               |
| Rv2032_IDRI         | 145                          | 0.522      | 0.57               | 0.48               |
| Rv0831_IDRI         | 730                          | 0.517      | 0.57               | 0.54               |
| Rv1629_FIND         | 126                          | 0.517      | 0.57               | 0.52               |
| Rv1980_SSI          | 189                          | 0.516      | 0.52               | 0.51               |
| Rv3875_Lionex       | 206                          | 0.514      | 0.48               | 0.49               |

|                               |      |       |      |      |
|-------------------------------|------|-------|------|------|
| Rv1980c_FIND_A.3              | 361  | 0.512 | 0.57 | 0.51 |
| Rv0583c_FIND_A.3              | 2139 | 0.509 | 0.57 | 0.52 |
| Rv2031c.Rv2873_SSI            | 94   | 0.509 | 0.57 | 0.56 |
| Rv3804c_FIND_A.1              | 154  | 0.502 | 0.52 | 0.44 |
| Rv2396_FIND                   | 217  | 0.5   | 0.52 | 0.52 |
| Rv3872_SSI                    | 88   | 0.496 | 0.52 | 0.52 |
| Rv3841_IDRI                   | 373  | 0.494 | 0.52 | 0.52 |
| Rv1030intra_FIND              | 199  | 0.494 | 0.52 | 0.49 |
| Rv1566c_FIND_A.1              | 222  | 0.489 | 0.48 | 0.49 |
| TBF10_IDRI                    | 77   | 0.489 | 0.48 | 0.49 |
| Rv2875_FIND                   | 192  | 0.488 | 0.57 | 0.49 |
| Rv0456c_FIND_A.1              | 437  | 0.487 | 0.48 | 0.49 |
| Antigen.Cocktail.V_Lionex     | 129  | 0.485 | 0.48 | 0.48 |
| Rv1886_FIND                   | 131  | 0.485 | 0.48 | 0.46 |
| Rv1984_IDRI                   | 337  | 0.48  | 0.48 | 0.49 |
| Rv2151_FIND_A.4               | 113  | 0.479 | 0.48 | 0.49 |
| Rv2220_IDRI                   | 446  | 0.477 | 0.57 | 0.51 |
| Rv2462c_SSI                   | 132  | 0.476 | 0.48 | 0.49 |
| Rv3810_FIND_A7                | 39   | 0.475 | 0.48 | 0.49 |
| Rv0934_IDRI                   | 247  | 0.473 | 0.57 | 0.56 |
| Rv1099_IDRI                   | 266  | 0.473 | 0.48 | 0.49 |
| Rv3879c.amino.acids.1.181_SSI | 221  | 0.473 | 0.52 | 0.52 |
| Rv1175_FIND                   | 104  | 0.473 | 0.43 | 0.44 |
| Rv1886c_FIND_A.6              | 91   | 0.47  | 0.52 | 0.56 |
| Rv2875_FIND_A.6               | 122  | 0.47  | 0.48 | 0.44 |
| Rv3354_SSI                    | 89   | 0.469 | 0.43 | 0.46 |
| Rv0440_FIND_A.4               | 262  | 0.468 | 0.52 | 0.46 |
| Rv1284_FIND_A.1               | 914  | 0.465 | 0.52 | 0.46 |
| Rv1984_SSI                    | 262  | 0.463 | 0.52 | 0.51 |
| Rv2185c_SSI                   | 372  | 0.463 | 0.43 | 0.44 |

|                     |     |       |      |      |
|---------------------|-----|-------|------|------|
| Rv3248_FIND_A.1     | 210 | 0.462 | 0.48 | 0.49 |
| Rv3864_FIND_A.5     | 74  | 0.462 | 0.52 | 0.52 |
| Rv1629_FIND_A.6     | 129 | 0.46  | 0.43 | 0.44 |
| Rv2396_FIND_A7      | 524 | 0.458 | 0.48 | 0.44 |
| Rv2031_IDRI         | 45  | 0.457 | 0.48 | 0.46 |
| Rv0577_SSI          | 241 | 0.457 | 0.48 | 0.46 |
| Rv2984_FIND_A.4     | 113 | 0.456 | 0.52 | 0.52 |
| Rv0272_FIND_A.2.ss  | 151 | 0.455 | 0.52 | 0.52 |
| Rv1980_IDRI         | 471 | 0.453 | 0.43 | 0.43 |
| Rv1030extern_FIND   | 167 | 0.453 | 0.48 | 0.49 |
| Rv3495c_FIND_A.6    | 74  | 0.452 | 0.48 | 0.51 |
| Rv3810_FIND         | 95  | 0.452 | 0.43 | 0.44 |
| Rv1926c_FIND_A.3    | 243 | 0.447 | 0.52 | 0.51 |
| Rv2094_FIND         | 162 | 0.447 | 0.43 | 0.44 |
| Rv1860_Lionex       | 121 | 0.44  | 0.48 | 0.49 |
| Rv1009_IDRI         | 443 | 0.438 | 0.52 | 0.52 |
| Rv1387_FIND_A7      | 112 | 0.436 | 0.48 | 0.48 |
| Rv0934_FIND_A.1     | 87  | 0.434 | 0.52 | 0.48 |
| Rv1586c_SSI         | 336 | 0.432 | 0.48 | 0.44 |
| Rv1196_FIND_A.3     | 150 | 0.431 | 0.52 | 0.49 |
| Rv3874_FIND_A.1     | 113 | 0.431 | 0.43 | 0.44 |
| Rv1860_IDRI         | 223 | 0.431 | 0.48 | 0.46 |
| Rv1984c_FIND_A.6    | 170 | 0.426 | 0.48 | 0.44 |
| Rv1837c_FIND_A.3    | 247 | 0.423 | 0.48 | 0.49 |
| Rv3875_FIND_A7      | 55  | 0.421 | 0.43 | 0.44 |
| Rv2875_IDRI         | 397 | 0.418 | 0.52 | 0.44 |
| Rv1242_FIND_A.2.ls  | 77  | 0.417 | 0.52 | 0.39 |
| Rv2282_FIND_A.2.ss  | 77  | 0.414 | 0.43 | 0.46 |
| Rv2746c_FIND_A7     | 47  | 0.413 | 0.43 | 0.44 |
| Rv0798c_FIND_A.2.ls | 283 | 0.412 | 0.52 | 0.49 |



|                               |      |       |      |      |
|-------------------------------|------|-------|------|------|
| Rv2927_FIND_A.1               | 1117 | 0.411 | 0.43 | 0.44 |
| Rv1984_FIND_A.2.ss            | 171  | 0.41  | 0.52 | 0.49 |
| Rv3878_FIND_A.1               | 50   | 0.408 | 0.43 | 0.43 |
| Rv3881_IDRI                   | 181  | 0.408 | 0.43 | 0.41 |
| Rv3326_FIND                   | 120  | 0.408 | 0.43 | 0.39 |
| Rv2031c_FIND_A.1              | 49   | 0.404 | 0.48 | 0.43 |
| Rv3762c_FIND_A.3              | 333  | 0.402 | 0.48 | 0.49 |
| Rv0394_FIND_A.3               | 116  | 0.401 | 0.43 | 0.44 |
| Rv1175c_FIND_A.6.2nd.coupling | 261  | 0.401 | 0.43 | 0.44 |
| Rv2544_FIND_A.4               | 110  | 0.401 | 0.43 | 0.46 |
| Rv0801_FIND_A.2.ls            | 299  | 0.4   | 0.43 | 0.44 |
| Rv3362_FIND_A.2.ss            | 105  | 0.399 | 0.43 | 0.43 |
| Rv3326_FIND_A.6               | 157  | 0.396 | 0.48 | 0.49 |
| Rv2094c_FIND_A.6              | 104  | 0.392 | 0.43 | 0.43 |
| Rv3243_FIND_A.2.ls            | 466  | 0.391 | 0.48 | 0.49 |
| Rv3326_FIND_A.2.ss            | 100  | 0.391 | 0.43 | 0.43 |
| Rv2873_FIND_A.6               | 87   | 0.39  | 0.43 | 0.39 |
| Rv3616_FIND                   | 128  | 0.39  | 0.39 | 0.39 |
| Rv0212_FIND_A.2.ss            | 184  | 0.388 | 0.48 | 0.49 |
| Rv3050_FIND_A.2.ss            | 154  | 0.388 | 0.48 | 0.48 |
| Rv0984_FIND_A.3               | 543  | 0.386 | 0.48 | 0.46 |
| Rv3775_FIND_A.2.ss            | 142  | 0.384 | 0.48 | 0.44 |
| Rv0379_FIND_A.1               | 70   | 0.38  | 0.48 | 0.46 |
| Rv2870_FIND_A.4               | 154  | 0.379 | 0.48 | 0.43 |
| Rv3376_FIND_A.3               | 141  | 0.378 | 0.48 | 0.44 |
| Rv3319_FIND_A.2.ss            | 157  | 0.375 | 0.52 | 0.41 |
| Rv3362_FIND                   | 143  | 0.369 | 0.43 | 0.43 |
| Rv0944_FIND_A.4               | 711  | 0.368 | 0.43 | 0.39 |
| Rv1030_FIND_A.6               | 67   | 0.366 | 0.39 | 0.39 |
| Rv2252.T01_FIND_A.2.ls        | 210  | 0.362 | 0.43 | 0.41 |

|                  |     |       |      |      |
|------------------|-----|-------|------|------|
| Rv3362c_FIND_A.6 | 169 | 0.362 | 0.39 | 0.39 |
| Rv1411c_FIND_A.1 | 28  | 0.35  | 0.43 | 0.38 |
| Rv1860_FIND_A.1  | 144 | 0.347 | 0.35 | 0.36 |
| Rv3763_FIND_A.3  | 208 | 0.347 | 0.39 | 0.38 |
| Rv2618_FIND_A.4  | 58  | 0.343 | 0.48 | 0.38 |

**Supplementary Table S5. Optimum cut-off values and area under the curve (AUC) for single antigens for discrimination between children classified as Definite TB versus children classified as Unlikely TB/Mantoux TST test negative, for all ages**

| <b>Antigen Name</b> | <b>Optimum cut-off value</b> | <b>AUC</b> | <b>Sensitivity</b> | <b>Specificity</b> |
|---------------------|------------------------------|------------|--------------------|--------------------|
| Rv3875_FIND         | 240                          | 0.74       | 0.70               | 0.71               |
| Rv3804_IDRI         | 135                          | 0.69       | 0.65               | 0.63               |
| Rv0831_IDRI         | 693                          | 0.69       | 0.65               | 0.66               |
| Rv2031c.Rv2873_SSI  | 80                           | 0.68       | 0.65               | 0.63               |
| Rv3616_FIND_A.5     | 66                           | 0.68       | 0.70               | 0.66               |
| Rv2873_IDRI         | 128                          | 0.68       | 0.65               | 0.68               |
| Rv1886_IDRI         | 207                          | 0.68       | 0.60               | 0.61               |
| Rv1030intra_FIND    | 199                          | 0.67       | 0.63               | 0.63               |
| Rv2873_FIND         | 88                           | 0.67       | 0.63               | 0.68               |
| DID64_IDRI          | 73                           | 0.67       | 0.65               | 0.66               |
| Rv3841_IDRI         | 343                          | 0.67       | 0.63               | 0.61               |
| Rv1636_SSI          | 103                          | 0.67       | 0.65               | 0.66               |
| Rv1886_FIND         | 126                          | 0.66       | 0.63               | 0.61               |
| Rv1629_FIND         | 122                          | 0.66       | 0.65               | 0.63               |
| Rv3875_Lionex       | 193                          | 0.66       | 0.63               | 0.61               |
| C10.E6_IDRI         | 104                          | 0.66       | 0.63               | 0.63               |
| Rv3872_SSI          | 84                           | 0.65       | 0.58               | 0.59               |
| DID90_IDRI          | 113                          | 0.65       | 0.60               | 0.63               |
| Rv0456c_FIND_A.1    | 355                          | 0.65       | 0.65               | 0.61               |
| Rv0222_SSI          | 127                          | 0.65       | 0.58               | 0.56               |
| Rv1099_IDRI         | 262                          | 0.64       | 0.63               | 0.63               |
| Rv1980_SSI          | 185                          | 0.64       | 0.63               | 0.61               |
| Rv3874_Lionex       | 125                          | 0.64       | 0.60               | 0.61               |

|                               |     |      |      |      |
|-------------------------------|-----|------|------|------|
| Rv0934_IDRI                   | 192 | 0.64 | 0.63 | 0.59 |
| Rv0577_SSI                    | 197 | 0.64 | 0.65 | 0.59 |
| Rv2032_IDRI                   | 139 | 0.64 | 0.70 | 0.61 |
| Rv3628_FIND_A.4               | 430 | 0.63 | 0.58 | 0.54 |
| Rv3881c_FIND_A.1              | 203 | 0.63 | 0.65 | 0.63 |
| Rv2396_FIND                   | 193 | 0.63 | 0.63 | 0.63 |
| Rv3495_FIND                   | 129 | 0.63 | 0.58 | 0.59 |
| Rv3354_SSI                    | 88  | 0.63 | 0.55 | 0.56 |
| Rv3874_IDRI                   | 150 | 0.63 | 0.63 | 0.63 |
| TBF10_IDRI                    | 71  | 0.63 | 0.55 | 0.56 |
| Rv3874.Rv3875_SSI             | 130 | 0.63 | 0.63 | 0.63 |
| Rv2220_IDRI                   | 505 | 0.62 | 0.60 | 0.61 |
| Rv1175_FIND                   | 101 | 0.62 | 0.58 | 0.59 |
| Rv0934_FIND_A.1               | 85  | 0.62 | 0.60 | 0.59 |
| Rv2875_FIND                   | 178 | 0.62 | 0.60 | 0.61 |
| Rv3810_FIND                   | 92  | 0.61 | 0.55 | 0.56 |
| Rv3864_FIND_A.5               | 62  | 0.61 | 0.65 | 0.63 |
| Rv2462c_SSI                   | 131 | 0.60 | 0.58 | 0.59 |
| Rv0394_FIND_A.3               | 103 | 0.60 | 0.58 | 0.56 |
| Rv3804c_FIND_A.1              | 145 | 0.60 | 0.63 | 0.56 |
| Rv0272_FIND_A.2.ss            | 139 | 0.59 | 0.58 | 0.59 |
| Rv1196_FIND_A.3               | 139 | 0.59 | 0.60 | 0.59 |
| Rv3326_FIND                   | 120 | 0.59 | 0.55 | 0.54 |
| Antigen.Cocktail.V_Lionex     | 100 | 0.58 | 0.65 | 0.56 |
| Rv1629_FIND_A.6               | 122 | 0.58 | 0.55 | 0.54 |
| Rv2396_FIND_A7                | 450 | 0.58 | 0.63 | 0.54 |
| Rv1586c_SSI                   | 323 | 0.58 | 0.60 | 0.59 |
| Rv3879c.amino.acids.1.181_SSI | 150 | 0.58 | 0.63 | 0.51 |
| Rv2151_FIND_A.4               | 85  | 0.58 | 0.58 | 0.59 |
| Rv3881_IDRI                   | 179 | 0.58 | 0.53 | 0.54 |

|                               |     |      |      |      |
|-------------------------------|-----|------|------|------|
| Rv3248_FIND_A.1               | 169 | 0.57 | 0.55 | 0.56 |
| Rv3616_FIND                   | 126 | 0.57 | 0.53 | 0.54 |
| Rv1387_FIND_A7                | 91  | 0.57 | 0.65 | 0.54 |
| Rv1886c_FIND_A.6              | 76  | 0.57 | 0.58 | 0.56 |
| Rv2544_FIND_A.4               | 107 | 0.56 | 0.53 | 0.54 |
| Rv3326_FIND_A.6               | 130 | 0.56 | 0.60 | 0.56 |
| Rv3362_FIND                   | 138 | 0.56 | 0.55 | 0.54 |
| Rv2870_FIND_A.4               | 154 | 0.56 | 0.58 | 0.54 |
| Rv3495c_FIND_A.6              | 67  | 0.56 | 0.53 | 0.54 |
| Rv1980_IDRI                   | 414 | 0.56 | 0.60 | 0.56 |
| Rv1566c_FIND_A.1              | 184 | 0.55 | 0.53 | 0.54 |
| Rv3874_FIND_A.1               | 104 | 0.55 | 0.50 | 0.51 |
| Rv2875_IDRI                   | 346 | 0.55 | 0.55 | 0.56 |
| Rv3362c_FIND_A.6              | 156 | 0.55 | 0.55 | 0.54 |
| Rv2984_FIND_A.4               | 92  | 0.55 | 0.58 | 0.56 |
| Rv3775_FIND_A.2.ss            | 123 | 0.54 | 0.58 | 0.54 |
| Rv2031_IDRI                   | 45  | 0.54 | 0.55 | 0.51 |
| Rv1030extern_FIND             | 146 | 0.54 | 0.58 | 0.54 |
| Rv3878_FIND_A.1               | 46  | 0.54 | 0.53 | 0.54 |
| Rv1175c_FIND_A.6.2nd.coupling | 220 | 0.54 | 0.53 | 0.54 |
| Rv3326_FIND_A.2.ss            | 79  | 0.54 | 0.58 | 0.56 |
| Rv1984_IDRI                   | 301 | 0.54 | 0.55 | 0.54 |
| Rv2094c_FIND_A.6              | 93  | 0.54 | 0.55 | 0.54 |
| Rv2094_FIND                   | 148 | 0.54 | 0.53 | 0.51 |
| Rv2031c_FIND_A.1              | 45  | 0.53 | 0.65 | 0.54 |
| Rv1860_Lionex                 | 115 | 0.53 | 0.55 | 0.56 |
| Rv0212_FIND_A.2.ss            | 146 | 0.53 | 0.55 | 0.54 |
| Rv0798c_FIND_A.2.ls           | 189 | 0.53 | 0.55 | 0.51 |
| Rv3875_FIND_A7                | 42  | 0.53 | 0.65 | 0.49 |
| Rv1009_IDRI                   | 314 | 0.53 | 0.58 | 0.59 |

|                        |     |      |      |      |
|------------------------|-----|------|------|------|
| Rv1242_FIND_A.2.ls     | 65  | 0.53 | 0.58 | 0.51 |
| Rv2618_FIND_A.4        | 58  | 0.53 | 0.58 | 0.54 |
| Rv3362_FIND_A.2.ss     | 101 | 0.53 | 0.50 | 0.51 |
| Rv0302_FIND_A.3        | 165 | 0.52 | 0.55 | 0.54 |
| Rv2875_FIND_A.6        | 115 | 0.52 | 0.50 | 0.51 |
| Rv1860_IDRI            | 194 | 0.52 | 0.53 | 0.54 |
| Rv1984_SSI             | 225 | 0.52 | 0.53 | 0.54 |
| Rv0632c_FIND_A.3       | 633 | 0.52 | 0.53 | 0.49 |
| Rv3243_FIND_A.2.ls     | 339 | 0.52 | 0.55 | 0.56 |
| Rv3762c_FIND_A.3       | 251 | 0.52 | 0.53 | 0.51 |
| Rv1984_FIND_A.2.ss     | 148 | 0.52 | 0.50 | 0.56 |
| Rv0440_FIND_A.4        | 221 | 0.51 | 0.50 | 0.49 |
| Rv1030_FIND_A.6        | 64  | 0.51 | 0.48 | 0.49 |
| Rv1980c_FIND_A.3       | 326 | 0.51 | 0.55 | 0.56 |
| Rv3810_FIND_A7         | 31  | 0.51 | 0.50 | 0.49 |
| Rv0801_FIND_A.2.ls     | 213 | 0.51 | 0.55 | 0.51 |
| Rv3050_FIND_A.2.ss     | 125 | 0.51 | 0.48 | 0.49 |
| Rv2282_FIND_A.2.ss     | 60  | 0.51 | 0.50 | 0.51 |
| Rv1837c_FIND_A.3       | 165 | 0.50 | 0.53 | 0.49 |
| Rv2252.T01_FIND_A.2.ls | 161 | 0.50 | 0.53 | 0.54 |
| Rv2746c_FIND_A7        | 40  | 0.50 | 0.48 | 0.49 |
| Rv2185c_SSI            | 304 | 0.50 | 0.53 | 0.49 |
| Rv0379_FIND_A.1        | 66  | 0.50 | 0.55 | 0.56 |
| Rv3319_FIND_A.2.ss     | 135 | 0.50 | 0.60 | 0.51 |
| Rv1926c_FIND_A.3       | 202 | 0.49 | 0.53 | 0.49 |
| Rv2873_FIND_A.6        | 71  | 0.49 | 0.53 | 0.49 |
| Rv1284_FIND_A.1        | 706 | 0.49 | 0.50 | 0.51 |
| Rv2927_FIND_A.1        | 803 | 0.49 | 0.55 | 0.51 |
| Rv1411c_FIND_A.1       | 28  | 0.49 | 0.50 | 0.49 |
| Rv1984c_FIND_A.6       | 142 | 0.47 | 0.53 | 0.49 |

|                  |      |      |      |      |
|------------------|------|------|------|------|
| Rv0984_FIND_A.3  | 371  | 0.47 | 0.55 | 0.54 |
| Rv3763_FIND_A.3  | 148  | 0.47 | 0.55 | 0.44 |
| Rv3376_FIND_A.3  | 127  | 0.46 | 0.45 | 0.46 |
| Rv0583c_FIND_A.3 | 1963 | 0.46 | 0.53 | 0.51 |
| Rv1860_FIND_A.1  | 104  | 0.44 | 0.53 | 0.46 |
| Rv0944_FIND_A.4  | 697  | 0.44 | 0.45 | 0.46 |

**Supplementary Table S6. Optimum cut-off values and area under the curve (AUC) for single antigens for discrimination between children classified as Definite TB versus children classified as Unlikely TB/Mantoux TST test positive, for all ages**

| <b>Antigen Name</b> | <b>Optimum cut-off value</b> | <b>AUC</b> | <b>Sensitivity</b> | <b>Specificity</b> |
|---------------------|------------------------------|------------|--------------------|--------------------|
| DID64_IDRI          | 95                           | 0.59       | 0.60               | 0.64               |
| Rv3804c_FIND_A.1    | 168                          | 0.56       | 0.50               | 0.49               |
| DID90_IDRI          | 147                          | 0.53       | 0.55               | 0.56               |
| TBF10_IDRI          | 106                          | 0.52       | 0.53               | 0.54               |
| Rv3628_FIND_A.4     | 630                          | 0.52       | 0.50               | 0.51               |
| Rv3616_FIND_A.5     | 109                          | 0.51       | 0.50               | 0.51               |
| Rv3874_Lionex       | 155                          | 0.50       | 0.48               | 0.49               |
| Rv0583c_FIND_A.3    | 1944                         | 0.50       | 0.53               | 0.54               |
| Rv0632c_FIND_A.3    | 633                          | 0.50       | 0.53               | 0.54               |
| C10.E6_IDRI         | 140                          | 0.48       | 0.48               | 0.46               |
| Rv2220_IDRI         | 623                          | 0.48       | 0.53               | 0.54               |
| Rv3874.Rv3875_SSI   | 192                          | 0.47       | 0.50               | 0.51               |
| Rv1009_IDRI         | 439                          | 0.47       | 0.53               | 0.54               |
| Rv3881c_FIND_A.1    | 352                          | 0.47       | 0.50               | 0.51               |
| Rv3864_FIND_A.5     | 79                           | 0.46       | 0.50               | 0.46               |
| Rv3874_IDRI         | 204                          | 0.46       | 0.45               | 0.46               |
| Rv1636_SSI          | 128                          | 0.46       | 0.55               | 0.49               |
| Rv3875_FIND         | 342                          | 0.46       | 0.53               | 0.51               |
| Rv0831_IDRI         | 930                          | 0.44       | 0.45               | 0.46               |
| Rv1886_IDRI         | 283                          | 0.44       | 0.50               | 0.49               |
| Rv2873_FIND         | 109                          | 0.44       | 0.55               | 0.49               |
| Rv3804_IDRI         | 207                          | 0.44       | 0.45               | 0.46               |
| Rv3875_Lionex       | 248                          | 0.43       | 0.48               | 0.46               |
| Rv3495_FIND         | 167                          | 0.43       | 0.48               | 0.46               |



|                           |     |      |      |      |
|---------------------------|-----|------|------|------|
| Rv0934_IDRI               | 303 | 0.43 | 0.45 | 0.46 |
| Rv2032_IDRI               | 191 | 0.43 | 0.43 | 0.44 |
| Rv1886_FIND               | 171 | 0.43 | 0.48 | 0.49 |
| Rv2875_FIND_A.6           | 130 | 0.43 | 0.43 | 0.44 |
| Rv1980c_FIND_A.3          | 364 | 0.43 | 0.50 | 0.44 |
| Rv0934_FIND_A.1           | 114 | 0.43 | 0.40 | 0.41 |
| Rv1629_FIND               | 151 | 0.43 | 0.50 | 0.46 |
| Rv1926c_FIND_A.3          | 202 | 0.42 | 0.53 | 0.44 |
| Rv3874_FIND_A.1           | 160 | 0.42 | 0.43 | 0.44 |
| Rv1980_SSI                | 219 | 0.42 | 0.48 | 0.49 |
| Rv2873_IDRI               | 172 | 0.42 | 0.45 | 0.46 |
| Rv3354_SSI                | 110 | 0.42 | 0.50 | 0.51 |
| Rv1886c_FIND_A.6          | 91  | 0.42 | 0.50 | 0.46 |
| Rv2031_IDRI               | 49  | 0.42 | 0.48 | 0.44 |
| Antigen.Cocktail.V_Lionex | 145 | 0.41 | 0.45 | 0.44 |
| Rv3872_SSI                | 109 | 0.41 | 0.48 | 0.49 |
| Rv3810_FIND               | 128 | 0.41 | 0.48 | 0.46 |
| Rv2875_FIND               | 255 | 0.41 | 0.48 | 0.49 |
| Rv1984_IDRI               | 349 | 0.41 | 0.45 | 0.46 |
| Rv1099_IDRI               | 416 | 0.41 | 0.43 | 0.41 |
| Rv0456c_FIND_A.1          | 582 | 0.41 | 0.48 | 0.41 |
| Rv2875_IDRI               | 510 | 0.40 | 0.43 | 0.44 |
| Rv2031c.Rv2873_SSI        | 115 | 0.40 | 0.50 | 0.44 |
| Rv0222_SSI                | 182 | 0.40 | 0.45 | 0.44 |
| Rv1030intra_FIND          | 281 | 0.40 | 0.45 | 0.46 |
| Rv1387_FIND_A7            | 131 | 0.40 | 0.45 | 0.44 |
| Rv1196_FIND_A.3           | 183 | 0.40 | 0.40 | 0.41 |
| Rv3326_FIND               | 155 | 0.40 | 0.40 | 0.41 |
| Rv2396_FIND               | 347 | 0.40 | 0.38 | 0.38 |
| Rv0302_FIND_A.3           | 196 | 0.39 | 0.45 | 0.41 |

|                               |      |      |      |      |
|-------------------------------|------|------|------|------|
| Rv0379_FIND_A.1               | 85   | 0.39 | 0.45 | 0.44 |
| Rv3875_FIND_A7                | 57   | 0.39 | 0.45 | 0.46 |
| Rv2462c_SSI                   | 156  | 0.39 | 0.43 | 0.41 |
| Rv1629_FIND_A.6               | 130  | 0.39 | 0.48 | 0.41 |
| Rv3248_FIND_A.1               | 224  | 0.39 | 0.48 | 0.41 |
| Rv1566c_FIND_A.1              | 281  | 0.39 | 0.45 | 0.46 |
| Rv2396_FIND_A7                | 1624 | 0.39 | 0.43 | 0.41 |
| Rv3495c_FIND_A.6              | 78   | 0.39 | 0.43 | 0.44 |
| Rv0272_FIND_A.2.ss            | 161  | 0.39 | 0.43 | 0.38 |
| Rv2094c_FIND_A.6              | 114  | 0.39 | 0.38 | 0.38 |
| Rv3879c.amino.acids.1.181_SSI | 212  | 0.39 | 0.48 | 0.38 |
| Rv3881_IDRI                   | 204  | 0.38 | 0.43 | 0.41 |
| Rv1984_SSI                    | 277  | 0.38 | 0.40 | 0.41 |
| Rv3616_FIND                   | 169  | 0.38 | 0.43 | 0.44 |
| Rv0394_FIND_A.3               | 149  | 0.38 | 0.43 | 0.44 |
| Rv0440_FIND_A.4               | 262  | 0.38 | 0.45 | 0.38 |
| Rv2746c_FIND_A7               | 47   | 0.38 | 0.40 | 0.41 |
| Rv3362_FIND                   | 179  | 0.38 | 0.43 | 0.41 |
| Rv1175_FIND                   | 138  | 0.38 | 0.43 | 0.41 |
| Rv2544_FIND_A.4               | 122  | 0.37 | 0.43 | 0.38 |
| Rv1860_Lionex                 | 125  | 0.37 | 0.45 | 0.44 |
| Rv3810_FIND_A7                | 37   | 0.37 | 0.38 | 0.44 |
| Rv2151_FIND_A.4               | 124  | 0.37 | 0.38 | 0.38 |
| Rv0944_FIND_A.4               | 885  | 0.37 | 0.40 | 0.38 |
| Rv2870_FIND_A.4               | 213  | 0.37 | 0.40 | 0.41 |
| Rv2984_FIND_A.4               | 113  | 0.37 | 0.45 | 0.41 |
| Rv2031c_FIND_A.1              | 56   | 0.36 | 0.40 | 0.36 |
| Rv3362c_FIND_A.6              | 212  | 0.36 | 0.43 | 0.36 |
| Rv1860_IDRI                   | 247  | 0.36 | 0.45 | 0.41 |
| Rv1980_IDRI                   | 510  | 0.36 | 0.40 | 0.36 |

|                               |     |      |      |      |
|-------------------------------|-----|------|------|------|
| Rv3362_FIND_A.2.ss            | 117 | 0.36 | 0.38 | 0.38 |
| Rv1984_FIND_A.2.ss            | 183 | 0.35 | 0.43 | 0.44 |
| Rv3762c_FIND_A.3              | 335 | 0.35 | 0.43 | 0.44 |
| Rv2094_FIND                   | 193 | 0.35 | 0.38 | 0.36 |
| Rv3326_FIND_A.6               | 160 | 0.35 | 0.45 | 0.41 |
| Rv2282_FIND_A.2.ss            | 77  | 0.35 | 0.38 | 0.38 |
| Rv2618_FIND_A.4               | 68  | 0.35 | 0.33 | 0.31 |
| Rv1175c_FIND_A.6.2nd.coupling | 282 | 0.35 | 0.40 | 0.36 |
| Rv1984c_FIND_A.6              | 178 | 0.35 | 0.38 | 0.36 |
| Rv3376_FIND_A.3               | 141 | 0.35 | 0.40 | 0.41 |
| Rv3841_IDRI                   | 426 | 0.35 | 0.40 | 0.38 |
| Rv0984_FIND_A.3               | 503 | 0.35 | 0.45 | 0.41 |
| Rv1284_FIND_A.1               | 938 | 0.34 | 0.35 | 0.33 |
| Rv2185c_SSI                   | 353 | 0.34 | 0.40 | 0.33 |
| Rv1242_FIND_A.2.ls            | 89  | 0.33 | 0.35 | 0.36 |
| Rv1030extern_FIND             | 201 | 0.33 | 0.38 | 0.36 |
| Rv0798c_FIND_A.2.ls           | 283 | 0.33 | 0.43 | 0.41 |
| Rv0577_SSI                    | 322 | 0.33 | 0.35 | 0.36 |
| Rv2873_FIND_A.6               | 92  | 0.33 | 0.38 | 0.38 |
| Rv3878_FIND_A.1               | 55  | 0.33 | 0.38 | 0.36 |
| Rv1030_FIND_A.6               | 78  | 0.32 | 0.40 | 0.38 |
| Rv3775_FIND_A.2.ss            | 159 | 0.32 | 0.38 | 0.36 |
| Rv1837c_FIND_A.3              | 254 | 0.31 | 0.38 | 0.36 |
| Rv1411c_FIND_A.1              | 34  | 0.31 | 0.33 | 0.33 |
| Rv3326_FIND_A.2.ss            | 98  | 0.31 | 0.43 | 0.31 |
| Rv3763_FIND_A.3               | 214 | 0.31 | 0.33 | 0.33 |
| Rv1586c_SSI                   | 475 | 0.31 | 0.35 | 0.36 |
| Rv2252.T01_FIND_A.2.ls        | 210 | 0.31 | 0.40 | 0.36 |
| Rv0212_FIND_A.2.ss            | 178 | 0.31 | 0.45 | 0.36 |
| Rv3243_FIND_A.2.ls            | 476 | 0.31 | 0.40 | 0.38 |

|                    |      |      |      |      |
|--------------------|------|------|------|------|
| Rv2927_FIND_A.1    | 1281 | 0.30 | 0.33 | 0.31 |
| Rv3050_FIND_A.2.ss | 164  | 0.30 | 0.40 | 0.33 |
| Rv0801_FIND_A.2.ls | 307  | 0.30 | 0.35 | 0.36 |
| Rv3319_FIND_A.2.ss | 185  | 0.29 | 0.33 | 0.33 |
| Rv1860_FIND_A.1    | 144  | 0.27 | 0.33 | 0.33 |

**Supplementary Table S7. Optimum cut-off values and area under the curve (AUC) for single antigens for discrimination between children classified as Definite TB versus children classified as Unconfirmed TB, for all ages**

| <b>Antigen Name</b> | <b>Optimum cut-off value</b> | <b>AUC</b> | <b>Sensitivity</b> | <b>Specificity</b> |
|---------------------|------------------------------|------------|--------------------|--------------------|
| Rv1886_FIND         | 131                          | 0.63       | 0.60               | 0.62               |
| Rv2220_IDRI         | 496                          | 0.62       | 0.60               | 0.62               |
| Rv3804c_FIND_A.1    | 154                          | 0.61       | 0.55               | 0.51               |
| DID64_IDRI          | 108                          | 0.61       | 0.60               | 0.62               |
| C10.E6_IDRI         | 115                          | 0.60       | 0.60               | 0.59               |
| Rv3495_FIND         | 129                          | 0.60       | 0.58               | 0.56               |
| Rv1636_SSI          | 105                          | 0.60       | 0.63               | 0.64               |
| Rv3874_Lionex       | 134                          | 0.60       | 0.60               | 0.59               |
| TBF10_IDRI          | 84                           | 0.59       | 0.53               | 0.54               |
| Rv1980_SSI          | 188                          | 0.59       | 0.60               | 0.62               |
| Rv3354_SSI          | 88                           | 0.59       | 0.55               | 0.62               |
| Rv3875_FIND         | 309                          | 0.59       | 0.60               | 0.62               |
| Rv1886_IDRI         | 216                          | 0.58       | 0.55               | 0.56               |
| Rv3874.Rv3875_SSI   | 136                          | 0.58       | 0.60               | 0.54               |
| Rv3875_Lionex       | 205                          | 0.58       | 0.58               | 0.56               |
| Rv1030extern_FIND   | 149                          | 0.58       | 0.55               | 0.56               |
| Rv3628_FIND_A.4     | 521                          | 0.57       | 0.53               | 0.54               |
| Rv1099_IDRI         | 299                          | 0.57       | 0.58               | 0.54               |
| Rv1175_FIND         | 101                          | 0.57       | 0.58               | 0.54               |
| Rv2875_FIND         | 184                          | 0.57       | 0.60               | 0.59               |
| Rv2873_IDRI         | 146                          | 0.57       | 0.60               | 0.62               |
| Rv3804_IDRI         | 184                          | 0.57       | 0.55               | 0.56               |
| Rv3874_IDRI         | 167                          | 0.56       | 0.58               | 0.54               |

|                               |     |      |      |      |
|-------------------------------|-----|------|------|------|
| Rv3872_SSI                    | 92  | 0.56 | 0.58 | 0.59 |
| Rv0222_SSI                    | 144 | 0.56 | 0.53 | 0.54 |
| Rv1629_FIND                   | 133 | 0.56 | 0.58 | 0.56 |
| Rv2094_FIND                   | 128 | 0.56 | 0.58 | 0.54 |
| DID90_IDRI                    | 137 | 0.56 | 0.55 | 0.56 |
| Rv2032_IDRI                   | 155 | 0.56 | 0.55 | 0.49 |
| Rv1030intra_FIND              | 222 | 0.56 | 0.55 | 0.54 |
| Rv0831_IDRI                   | 844 | 0.55 | 0.55 | 0.56 |
| Rv1009_IDRI                   | 377 | 0.55 | 0.55 | 0.56 |
| Rv2875_IDRI                   | 336 | 0.55 | 0.58 | 0.56 |
| Rv3616_FIND_A.5               | 93  | 0.54 | 0.55 | 0.54 |
| Rv3810_FIND                   | 99  | 0.54 | 0.53 | 0.51 |
| Rv3881c_FIND_A.1              | 227 | 0.53 | 0.60 | 0.54 |
| Rv3881_IDRI                   | 181 | 0.53 | 0.53 | 0.49 |
| Rv0272_FIND_A.2.ss            | 139 | 0.53 | 0.58 | 0.54 |
| Rv0934_FIND_A.1               | 88  | 0.53 | 0.55 | 0.56 |
| Rv2462c_SSI                   | 131 | 0.53 | 0.58 | 0.54 |
| Rv3879c.amino.acids.1.181_SSI | 180 | 0.53 | 0.50 | 0.51 |
| Antigen.Cocktail.V_Lionex     | 122 | 0.53 | 0.48 | 0.49 |
| Rv2031c.Rv2873_SSI            | 108 | 0.52 | 0.55 | 0.54 |
| Rv0456c_FIND_A.1              | 495 | 0.52 | 0.53 | 0.51 |
| Rv0934_IDRI                   | 247 | 0.52 | 0.58 | 0.51 |
| Rv1926c_FIND_A.3              | 202 | 0.52 | 0.53 | 0.54 |
| Rv2984_FIND_A.4               | 102 | 0.52 | 0.50 | 0.54 |
| Rv0394_FIND_A.3               | 115 | 0.51 | 0.55 | 0.56 |
| Rv2870_FIND_A.4               | 163 | 0.51 | 0.53 | 0.54 |
| Rv1886c_FIND_A.6              | 90  | 0.51 | 0.50 | 0.51 |
| Rv0632c_FIND_A.3              | 633 | 0.51 | 0.53 | 0.51 |
| Rv2185c_SSI                   | 317 | 0.51 | 0.50 | 0.51 |
| Rv1984_IDRI                   | 326 | 0.50 | 0.53 | 0.49 |

|                    |     |      |      |      |
|--------------------|-----|------|------|------|
| Rv3495c_FIND_A.6   | 71  | 0.50 | 0.50 | 0.51 |
| Rv3326_FIND        | 127 | 0.50 | 0.53 | 0.46 |
| Rv3875_FIND_A7     | 47  | 0.50 | 0.50 | 0.51 |
| Rv1196_FIND_A.3    | 162 | 0.50 | 0.50 | 0.51 |
| Rv3616_FIND        | 140 | 0.50 | 0.48 | 0.49 |
| Rv3362_FIND        | 142 | 0.50 | 0.53 | 0.49 |
| Rv1980c_FIND_A.3   | 361 | 0.50 | 0.53 | 0.54 |
| Rv2746c_FIND_A7    | 39  | 0.50 | 0.48 | 0.49 |
| Rv3874_FIND_A.1    | 111 | 0.49 | 0.50 | 0.51 |
| Rv1586c_SSI        | 336 | 0.49 | 0.55 | 0.51 |
| Rv0379_FIND_A.1    | 70  | 0.49 | 0.55 | 0.51 |
| Rv2544_FIND_A.4    | 114 | 0.48 | 0.48 | 0.49 |
| Rv2282_FIND_A.2.ss | 55  | 0.48 | 0.55 | 0.46 |
| Rv1984_SSI         | 250 | 0.48 | 0.50 | 0.51 |
| Rv1387_FIND_A7     | 112 | 0.48 | 0.50 | 0.51 |
| Rv1629_FIND_A.6    | 130 | 0.48 | 0.48 | 0.46 |
| Rv3248_FIND_A.1    | 209 | 0.48 | 0.50 | 0.49 |
| Rv3841_IDRI        | 394 | 0.48 | 0.50 | 0.51 |
| Rv2873_FIND        | 128 | 0.48 | 0.48 | 0.49 |
| Rv2875_FIND_A.6    | 132 | 0.48 | 0.43 | 0.44 |
| Rv1242_FIND_A.2.ls | 76  | 0.47 | 0.48 | 0.49 |
| Rv2151_FIND_A.4    | 99  | 0.47 | 0.50 | 0.51 |
| Rv3362_FIND_A.2.ss | 103 | 0.47 | 0.48 | 0.46 |
| Rv1980_IDRI        | 492 | 0.47 | 0.40 | 0.41 |
| Rv3864_FIND_A.5    | 81  | 0.47 | 0.48 | 0.49 |
| Rv0577_SSI         | 261 | 0.47 | 0.53 | 0.46 |
| Rv1860_Lionex      | 119 | 0.47 | 0.53 | 0.51 |
| Rv1984_FIND_A.2.ss | 160 | 0.47 | 0.50 | 0.49 |
| Rv2031_IDRI        | 49  | 0.46 | 0.48 | 0.44 |
| Rv2927_FIND_A.1    | 948 | 0.46 | 0.45 | 0.44 |

|                                   |      |      |      |      |
|-----------------------------------|------|------|------|------|
| Rv3362c_FIND_A.6                  | 196  | 0.45 | 0.45 | 0.46 |
| Rv3376_FIND_A.3                   | 118  | 0.45 | 0.48 | 0.49 |
| Rv3326_FIND_A.6                   | 157  | 0.45 | 0.48 | 0.49 |
| Rv3763_FIND_A.3                   | 167  | 0.44 | 0.48 | 0.46 |
| Rv2873_FIND_A.6                   | 78   | 0.44 | 0.48 | 0.49 |
| Rv0212_FIND_A.2.ss                | 178  | 0.44 | 0.45 | 0.46 |
| Rv1860_IDRI                       | 223  | 0.43 | 0.50 | 0.51 |
| Rv3050_FIND_A.2.ss                | 147  | 0.43 | 0.45 | 0.46 |
| Rv3878_FIND_A.1                   | 50   | 0.43 | 0.45 | 0.44 |
| Rv2396_FIND                       | 312  | 0.42 | 0.43 | 0.44 |
| Rv0944_FIND_A.4                   | 617  | 0.42 | 0.50 | 0.49 |
| Rv1837c_FIND_A.3                  | 213  | 0.42 | 0.43 | 0.44 |
| Rv1984c_FIND_A.6                  | 167  | 0.42 | 0.48 | 0.46 |
| Rv2252.T01_FIND_A.2.ls            | 170  | 0.42 | 0.50 | 0.44 |
| Rv0440_FIND_A.4                   | 262  | 0.41 | 0.45 | 0.46 |
| Rv3326_FIND_A.2.ss                | 85   | 0.41 | 0.53 | 0.46 |
| Rv1566c_FIND_A.1                  | 284  | 0.41 | 0.45 | 0.46 |
| Rv0798c_FIND_A.2.ls               | 271  | 0.41 | 0.48 | 0.46 |
| Rv1030_FIND_A.6                   | 72   | 0.40 | 0.45 | 0.41 |
| Rv2031c_FIND_A.1                  | 55   | 0.40 | 0.40 | 0.41 |
| Rv0984_FIND_A.3                   | 470  | 0.40 | 0.48 | 0.49 |
| Rv0801_FIND_A.2.ls                | 227  | 0.40 | 0.48 | 0.46 |
| Rv3319_FIND_A.2.ss                | 142  | 0.40 | 0.55 | 0.41 |
| Rv3762c_FIND_A.3                  | 301  | 0.40 | 0.45 | 0.44 |
| Rv0583c_FIND_A.3                  | 2042 | 0.40 | 0.50 | 0.44 |
| Rv3775_FIND_A.2.ss                | 135  | 0.40 | 0.53 | 0.41 |
| Rv2396_FIND_A7                    | 1624 | 0.39 | 0.43 | 0.44 |
| Rv2094c_FIND_A.6                  | 109  | 0.39 | 0.40 | 0.41 |
| Rv1175c_FIND_A.6.2nd.couplin<br>g | 243  | 0.39 | 0.45 | 0.46 |



|                    |     |      |      |      |
|--------------------|-----|------|------|------|
| Rv3243_FIND_A.2.ls | 352 | 0.39 | 0.53 | 0.44 |
| Rv2618_FIND_A.4    | 62  | 0.39 | 0.40 | 0.41 |
| Rv0302_FIND_A.3    | 229 | 0.38 | 0.40 | 0.41 |
| Rv1284_FIND_A.1    | 883 | 0.37 | 0.40 | 0.41 |
| Rv1411c_FIND_A.1   | 30  | 0.37 | 0.43 | 0.46 |
| Rv3810_FIND_A7     | 38  | 0.36 | 0.38 | 0.38 |
| Rv1860_FIND_A.1    | 125 | 0.32 | 0.35 | 0.33 |
